# Supplementary material for: The synthesis of amphiphilic sexithiophene–poly(ethylene oxide) segmented copolymers
Source: Royal Society of Chemistry journal article supplement (doi:10.1039/b212382g), 2003-01-01
Supplement: b212382g.doc [file b212382g.doc]

# Supplementary Information

The synthesis of amphiphilic sexithiophene-poly(ethylene oxide) segmented copolymers

Oliver Henze and W. James Feast

IRC in Polymer Science and Technology, Durham University, South Road, Durham, DH1 3LE, UK

Melting points were obtained using an Electrothermal IA9200 series digital melting point apparatus. Elemental analysis data were obtained using an Exeter Analytical Elemental Analyser CE-440. Deuterated solvents were used as supplied. Chemical shifts are reported in parts per million with respect to the solvent chloroform. Tin-hydrogen and tin-carbon couplings were observed as expected, but not reported. Calculated molecular weights are reported in g mol-1. N-Butyllithium was purchased from Acros (Fisher Scientific); all other reagents were purchased from Aldrich Chemicals and used without further purification.

***Poly(ethylene glycol)-di-(5-bromo-2,2'-bithiophene-5'-carboxylate)* 3b.** Poly(ethylene glycol) (Mn=1000, PDI=1.04, 4.3 g, 4.3 mmol) was heated (90C) in a round bottom single neck flask and the melt stirred under high vacuum for 1/2h. Toluene (dry, 40 ml) and pyridine (dry, 1.0 g, 13.0 mmol) were added to the degassed polymer melt and the mixture stirred until a clear solution was obtained. Compound **1** (4 g, 13 mmol) was added as a solid to the hot (80C) polymer solution. After complete addition the mixture was stirred at 80C for another 12h. The mixture was allowed to cool to r.t., filtered through Celite (Aldrich) and purified by column chromatography (silica, diameter 5 cm, length 10 cm, first dichloromethane (DCM), then gradually an increased amount of ethanol) to give *poly(ethylene glycol)-di-(5-bromo-2,2'-bithiophene-5'-carboxylate)* **3b**(3.4 g, 54%) as green-brown oil. GPC (THF): Mn = 1780 g mol-1; Mw = 2020 g mol-1; PDI = 1.13; 1H NMR (300MHz, CDCl3)  3.48-3.64 (m, -OC*H*2C*H*2-), 3.71 (t, 3J = 5Hz, 4H, -COOCH2C*H*2-), 4.34 (t, 3J = 5Hz, 4H, -COOC*H*2CH2-), 6.91 (AB, A = 6.91, B = 6.92, JAB = 4Hz, 4H), 6.97 (d, 3J = 4Hz, 2H), 7.59 (d, 3J = 4Hz, 2H); 13C NMR (75 MHz, CDCl3)  64.08, 68.75, 70.22, 70.28, 70.31, 70.39, 112.58, 123.77, 125.03, 130.69, 131.42, 134.03, 137.35, 142.64, 161.38.

***Poly(ethylene glycol)-di-(5-bromo-2,2'-bithiophene-5'-carboxylate)* 3c.** Following the procedure used for the synthesis of **3b** poly(ethylene glycol) (Mn = 600, PDI = 1.09, 3.9 g, 6.5 mmol), **1** (6 g, 19.6 mmol), toluene (dry, 50 ml), and pyridine (dry, 1.6 g, 19.6 mmol) gave *poly(ethylene glycol)-di-(5-bromo-2,2'-bithiophene-5'-carboxylate)* **3c**(5.7 g, 77 %) as green-brown oil. GPC (THF): Mn = 1040 g mol-1; Mw = 1120 g mol-1; PDI = 1.08; 1H NMR (200MHz, CDCl3)  3.56-3.73 (m, -OC*H*2C*H*2-), 3.78 (t, 3J = 5Hz, 4H, -COOCH2C*H*2-), 4.41 (t, 3J = 5Hz, 4H, -COOC*H*2CH2-), 6.98 (AB, A = 6.97, B = 6.99, JAB = 4Hz, 4H), 7.04 (d, 3J = 4Hz, 2H), 7.66 (d, 3J = 4Hz, 2H); 13C NMR (75 MHz, CDCl3)  64.28, 68.96, 70.42, 70.48, 70.51, 70.59, 112.83, 123.97, 125.21, 130.86, 131.64, 134.24, 137.59, 142.91, 161.65.

***Poly[poly(ethylene glycol)-alt-(2,2’:5’,2’’:5'',2''':5''',2'''':5'''',2'''''-sexithiophene -5,5'''''-di-carboxylic acid)]* 5b*.*** Compound **3b** (1.3 g, 0.84 mmol) and **4** (410 mg, 0.84 mmol) were dissolved in toluene (dry, 10 ml). The system was degassed and let down to N2 repeatedly. After adding Pd(PPh3)4 (40 mg, 35 μmol) the system was refluxed for 24 h. Then the mixture was allowed to cool to r.t., chloroform (200 ml) was added, and the solution filtered through Celite (Aldrich). The filtrate was concentrated and the solute precipitated by addition to hexane (200 ml). The precipitate was recovered by filtration, dissolved in chloroform (5 ml) and reprecipitated by addition to ethanol (50 ml). The solid obtained was dried under vacuum (10-1 mbar) at 80 ˚C to give *poly[poly(ethylene glycol)-alt-(2,2’:5’,2’’:5'',2''':5''',2'''':5'''',2'''''-sexithiophene -5,5'''''-di-carboxylic acid)]* **5b** (400 mg, 30 %) as a dark red solid. GPC in DMF (LiBr) at 80˚C, Mn = 3000, Mw = 10700, PDI = 3.5; 1H NMR (400 MHz, CDCl3)  3.46-3.76 (m, -OC*H*2C*H*2-), 3.79 (t, 3J = 5Hz, 4H, -COOCH2C*H*2-), 4.33 (t, 3J = 5Hz, 4H, -COOC*H*2CH2-), 7.00-7.13 (m, 6H), 7.13-7.23 (m, 2H), 7.71 (d, 3J = 4.0Hz, 2H); 13C NMR (50 MHz, CDCl3)  64.34, 69.09, 70.53 (broad), 123.82, 124.59, 124.89, 125.99, 131.37, 134.44, 135.09, 135.64, 136.26, 137.50, 143.76, 161.83.

***Poly[poly(ethylene glycol)-alt-(2,2’:5’,2’’:5'',2''':5''',2'''':5'''',2'''''-sexithiophene -5,5'''''-di-carboxylic acid)]*** **5c**. Following the procedure used for the synthesis of **5b** with compound **3c** (1.54 g, 1.35 mmol), **4** (660 mg, 1.35 mmol), toluene (10 ml), Pd(PPh3)4 (75 mg, 65 μmol) gave *poly[poly(ethylene glycol)-alt-(2,2’:5’,2’’:5'',2''':5''',2'''':5'''',2'''''-sexithiophene -5,5'''''-di-carboxylic acid)]* **5c** (490 mg, 31 %) as a dark red solid. GPC in DMF (LiBr) at 80˚C, Mn = 2000, Mw = 2700, PDI = 1.3; 1H NMR (300 MHz, CDCl3)  3.50-3.75 (m, -OCH2CH2-), 3.79 (m, 4H, -COOCH2C*H*2-), 4.42 (m, 4H, -COOC*H*2CH2-), 6.99-7.14 (m, 6H), 7.14-7.23 (m, 2H), 7.64-7.76 (m, 2H); 13C NMR (50 MHz, CDCl3)  64.33, 69.09, 70.53 (broad), 123.80, 124.55, 124.86, 125.99, 131.35, 134.43, 135.07, 135.62, 136.25, 137.50, 143.76, 161.81.
